# Supplementary material
Source: publisher figshare collection journal article supplement (https://frontiersin.figshare.com/ndownloader/files/13684613)
Supplement: Supplementary file [file 13684613]

**A**

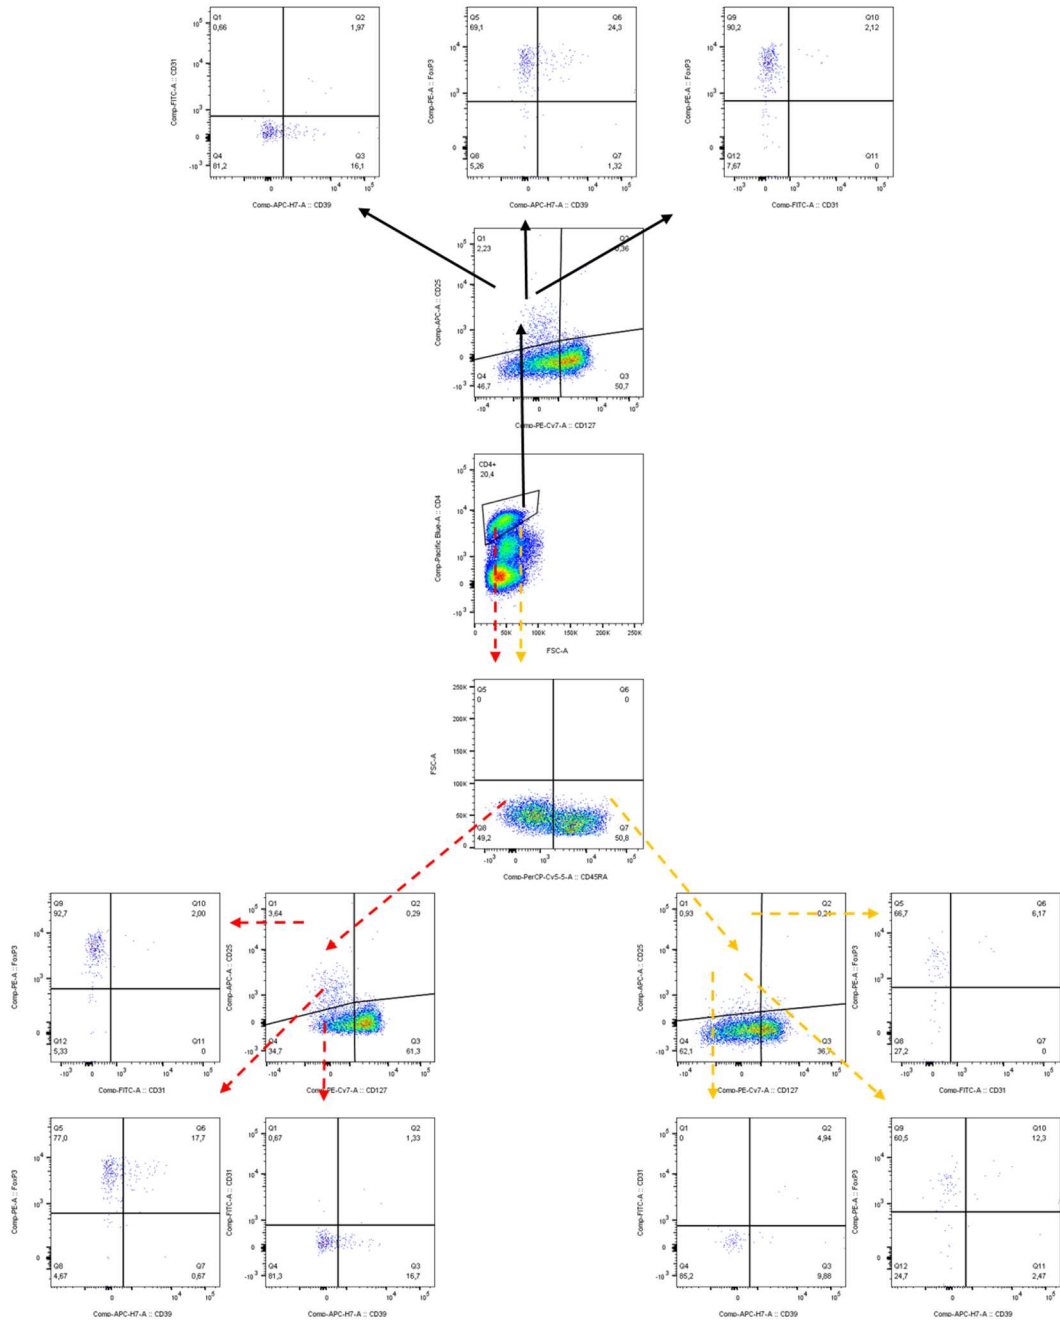

**B**

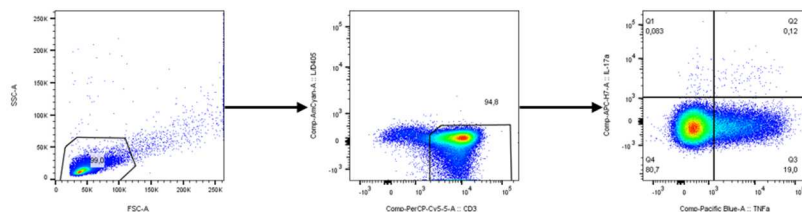

**Suppl. figure 1. Gating strategies of (A) Treg populations and (B) TNF $\alpha$  and IL-17A producing cells**

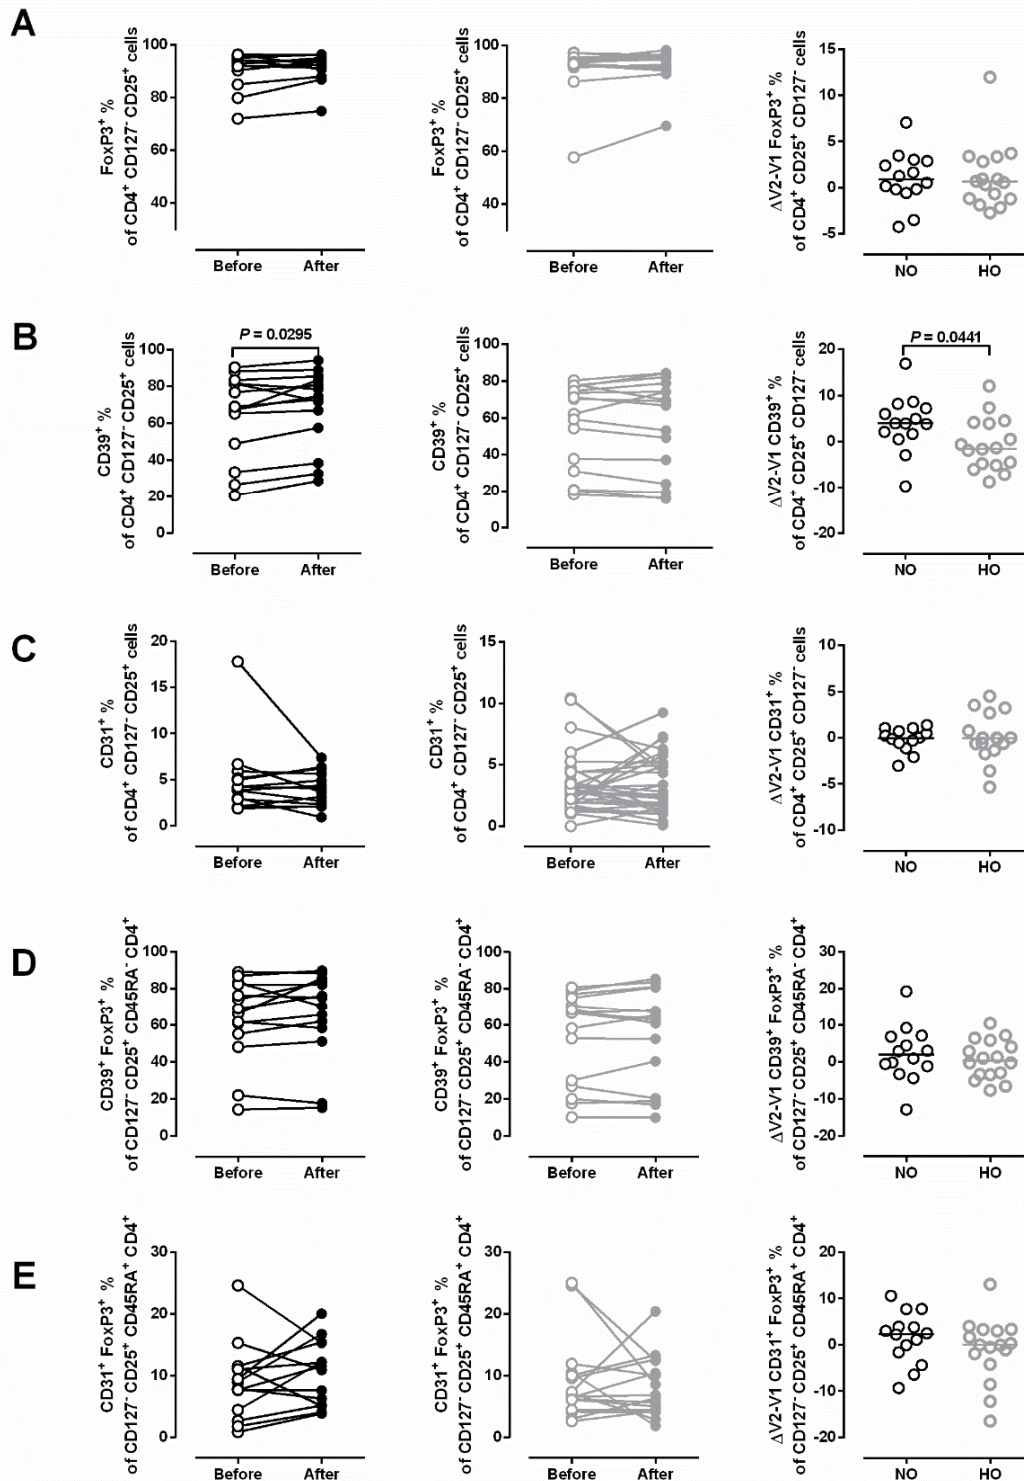

### Suppl. figure 2. Frequencies of different Treg populations

(A) FoxP3<sup>+</sup>, (B) CD39<sup>+</sup> and (C) CD31<sup>+</sup> of CD4<sup>+</sup> CD127<sup>-</sup> CD25<sup>+</sup> cells. (D) CD39<sup>+</sup> FoxP3<sup>+</sup> of CD127<sup>-</sup> CD25<sup>+</sup> CD45RA<sup>-</sup> CD4<sup>+</sup> cells. (E) CD31<sup>+</sup> FoxP3<sup>+</sup> of CD127<sup>-</sup> CD25<sup>+</sup> CD45RA<sup>+</sup> CD4<sup>+</sup> cells. All in MS patients after 4 weeks of normoxic (NO, n = 16, black circles) and hypoxic (HO, n = 14, grey circles) treadmill training. Three samples not analyzed due to quality issues. Comparison of training effects ( $\Delta$ V2-V1, right column). *P* values before vs. after training by Student's paired t test or Wilcoxon matched-pairs signed rank test. *P* values NO vs. HO by Mann-Whitney U test or Student's t test

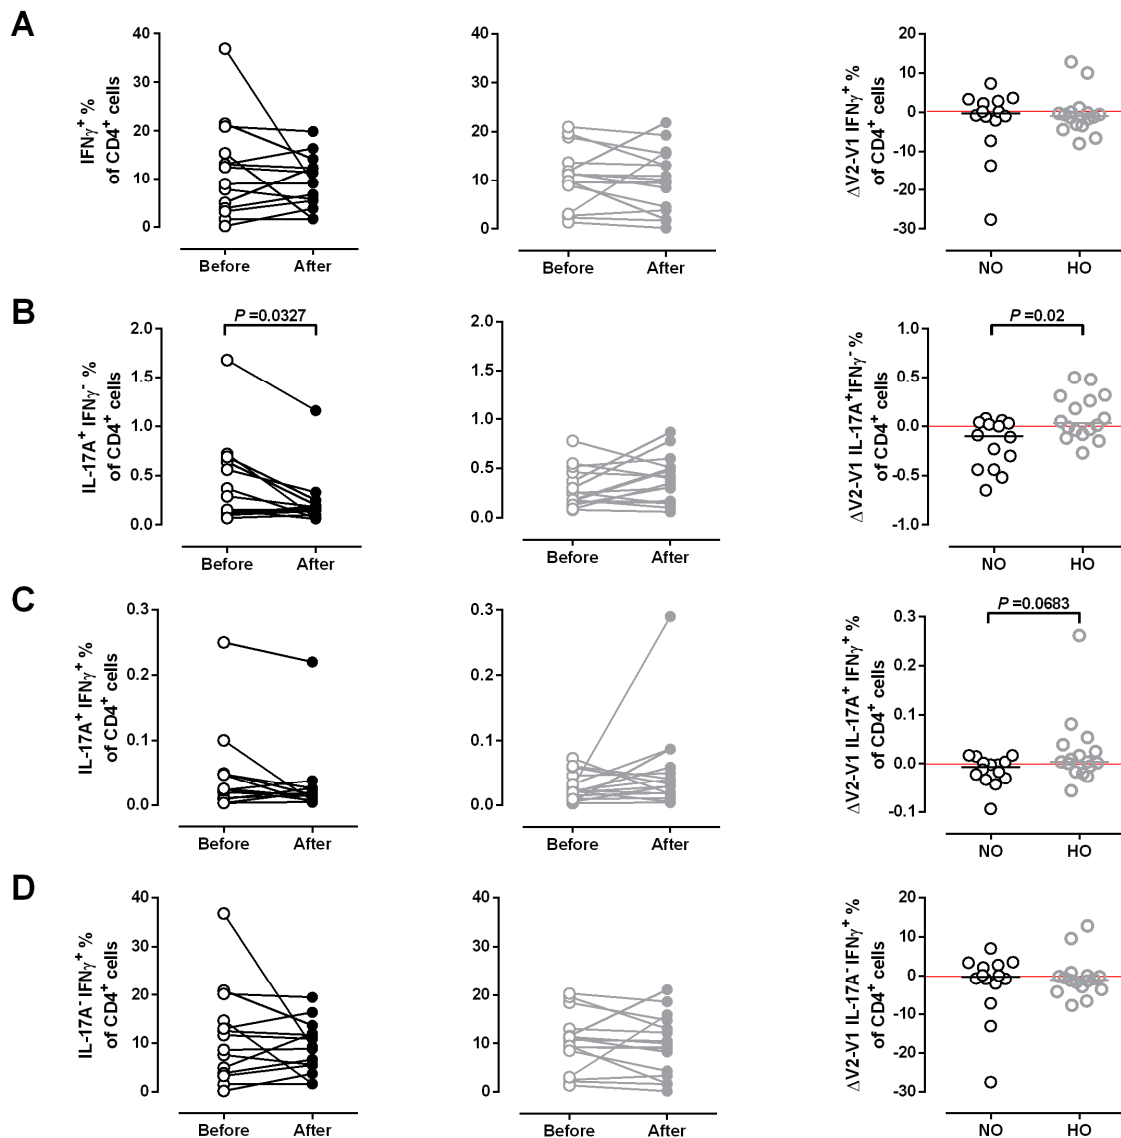

### Suppl. figure 3. Frequency of IL-17A and IFN- $\gamma$ producing T cells

Frequencies of (A) total IFN- $\gamma$ <sup>+</sup>, (B) IL-17A<sup>+</sup> IFN- $\gamma$ <sup>-</sup>, (C) IL-17A<sup>+</sup> IFN- $\gamma$ <sup>+</sup> and (D) IL-17A<sup>-</sup> IFN- $\gamma$ <sup>+</sup> of CD4<sup>+</sup> cells in MS patients after 4 weeks of normoxic (NO, n = 16, black circles) and hypoxic (HO, n = 14, grey circles) treadmill training. Three samples not analyzed due to quality issues. Comparison of training effects ( $\Delta$ V2-V1, right column). *P* values before vs. after training by Student's paired t test or Wilcoxon matched-pairs signed rank test. *P* values NO vs. HO by Mann-Whitney U test or Student's t test

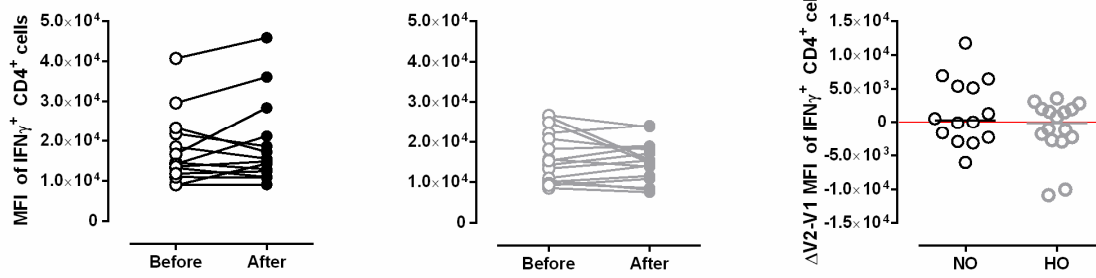

**Suppl. figure 4. Median fluorescence intensity of IFN- $\gamma$ -producing CD4<sup>+</sup> T cells**

Median fluorescence intensity (MFI) corresponding to the IFN- $\gamma$ -labelling of CD4<sup>+</sup> cells in MS patients after 4 weeks of normoxic (NO, n = 16, black circles) and hypoxic (HO, n = 14, grey circles) treadmill training. Three samples not analyzed due to quality issues
